# Supplementary material for: A Plasmid Set for Efficient Bacterial Artificial Chromosome (BAC) Transgenesis in Zebrafish
Source: PubMed Central journal article supplement (PMC4825653; doi:10.1534/g3.115.026344), 2016-01-26
Supplement: supp_g3.115.026344_TableS1.pdf [file supp_g3.115.026344_TableS1.pdf]

**Table S1.** Results for the transgenesis rate of the *cxcr4b:Lifeact-Citrine; cryaa:dsRed* transgene.

| number of transgenic embryos | number of non-transgenic embryos | total number of embryos | number of screened injected fish | germline mosaicism in % |
|------------------------------|----------------------------------|-------------------------|----------------------------------|-------------------------|
| 0                            | 61                               | 61                      | 2                                | 0                       |
| 0                            | 63                               | 63                      | 2                                | 0                       |
| 0                            | 63                               | 63                      | 1                                | 0                       |
| 0                            | 63                               | 63                      | 2                                | 0                       |
| 0                            | 64                               | 64                      | 2                                | 0                       |
| 0                            | 66                               | 66                      | 2                                | 0                       |
| 0                            | 68                               | 68                      | 1                                | 0                       |
| 0                            | 69                               | 69                      | 2                                | 0                       |
| 0                            | 72                               | 72                      | 2                                | 0                       |
| 0                            | 75                               | 75                      | 2                                | 0                       |
| 0                            | 79                               | 79                      | 2                                | 0                       |
| 0                            | 88                               | 88                      | 2                                | 0                       |
| 0                            | 90                               | 90                      | 2                                | 0                       |
| 0                            | 90                               | 90                      | 1                                | 0                       |
| 0                            | 94                               | 94                      | 2                                | 0                       |
| 0                            | 94                               | 94                      | 1                                | 0                       |
| 0                            | 96                               | 96                      | 2                                | 0                       |
| 0                            | 96                               | 96                      | 1                                | 0                       |
| 0                            | 102                              | 102                     | 2                                | 0                       |
| 0                            | 102                              | 102                     | 1                                | 0                       |
| 0                            | 109                              | 109                     | 2                                | 0                       |
| 0                            | 131                              | 131                     | 2                                | 0                       |
| 0                            | 137                              | 137                     | 1                                | 0                       |
| 0                            | 145                              | 145                     | 2                                | 0                       |
| 0                            | 164                              | 164                     | 1                                | 0                       |
| 0                            | 186                              | 186                     | 2                                | 0                       |
| 0                            | 200                              | 200                     | 1                                | 0                       |
| 0                            | 222                              | 222                     | 1                                | 0                       |
| 1                            | 30                               | 31                      | 1                                | 3.2                     |
| 2                            | 5                                | 7                       | 1                                | 28.6                    |
| 3                            | 165                              | 168                     | 1                                | 1.8                     |
| 4                            | 71                               | 75                      | 1                                | 5.3                     |
| 4                            | 122                              | 126                     | 1                                | 3.2                     |
| 6                            | 22                               | 28                      | 1                                | 21.4                    |
| 8                            | 92                               | 100                     | 1                                | 8.0                     |
| 17                           | 235                              | 252                     | 1                                | 6.7                     |

|    |     |     |   |      |
|----|-----|-----|---|------|
| 19 | 98  | 117 | 1 | 16.2 |
| 21 | 75  | 96  | 1 | 21.9 |
| 24 | 172 | 196 | 1 | 12.2 |
| 25 | 71  | 96  | 1 | 26.0 |
| 25 | 102 | 127 | 1 | 19.7 |
| 27 | 84  | 111 | 1 | 24.3 |
| 31 | 146 | 177 | 1 | 17.5 |
| 33 | 122 | 155 | 1 | 21.3 |
| 34 | 137 | 171 | 1 | 20   |
