# Supplementary material for: A Plasmid Set for Efficient Bacterial Artificial Chromosome (BAC) Transgenesis in Zebrafish
Source: PubMed Central journal article supplement (PMC4825653; doi:10.1534/g3.115.026344), 2016-01-26
Supplement: supp_g3.115.026344_TableS2.pdf [file supp_g3.115.026344_TableS2.pdf]

**Table S2.** Results for the transgenesis rate of the *cxcr4b:cxcr4b-Kate2-IRES-GFP-CaaX; cryaa:dsRed* transgene.

| number of transgenic embryos | number of non-transgenic embryos | total number of embryos | number of screened injected fish | germline mosaicism in % |
|------------------------------|----------------------------------|-------------------------|----------------------------------|-------------------------|
| 0                            | 153                              | 153                     | 2                                | 0                       |
| 0                            | 200                              | 200                     | 1                                | 0                       |
| 1                            | 18                               | 19                      | 1                                | 5.3                     |
| 1                            | 29                               | 30                      | 1                                | 3.3                     |
| 1                            | 39                               | 40                      | 1                                | 2.5                     |
| 2                            | 6                                | 8                       | 1                                | 25.0                    |
| 8                            | 17                               | 25                      | 1                                | 32.0                    |
| 11                           | 29                               | 40                      | 1                                | 27.5                    |
| 21                           | 142                              | 163                     | 1                                | 12.9                    |
| 25                           | 17                               | 42                      | 1                                | 59.5                    |
| 41                           | 388                              | 429                     | 1                                | 9.6                     |
