# Supplementary material for: A Plasmid Set for Efficient Bacterial Artificial Chromosome (BAC) Transgenesis in Zebrafish
Source: PubMed Central journal article supplement (PMC4825653; doi:10.1534/g3.115.026344), 2016-01-26
Supplement: supp_g3.115.026344_TableS3.pdf [file supp_g3.115.026344_TableS3.pdf]

|   |      |      |   |    |
|---|------|------|---|----|
| 0 | 100+ | 100+ | 1 | 0  |
| 0 | 100+ | 100+ | 1 | 0  |
| 0 | 100+ | 100+ | 1 | 0  |
| 0 | 100+ | 100+ | 1 | 0  |
| 0 | 100+ | 100+ | 1 | 0  |
| 0 | 100+ | 100+ | 1 | 0  |
| 0 | 100+ | 100+ | 1 | 0  |
| 0 | 100+ | 100+ | 1 | 0  |
| 0 | 100+ | 100+ | 1 | 0  |
| 0 | 100+ | 100+ | 1 | 0  |
| 0 | 100+ | 100+ | 1 | 0  |
| 0 | 100+ | 100+ | 1 | 0  |
| 0 | 100+ | 100+ | 1 | 0  |
| 0 | 100+ | 100+ | 1 | 0  |
| 0 | 100+ | 100+ | 1 | 0  |
| 0 | 100+ | 100+ | 1 | 0  |
| 0 | 100+ | 100+ | 1 | 0  |
| 0 | 100+ | 100+ | 1 | 0  |
| 0 | 100+ | 100+ | 1 | 0  |
| 0 | 100+ | 100+ | 1 | 0  |
| 0 | 100+ | 100+ | 1 | 0  |
| 0 | 100+ | 100+ | 1 | 0  |
| 0 | 100+ | 100+ | 1 | 0  |
| 0 | 100+ | 100+ | 1 | 0  |
| 0 | 100+ | 100+ | 2 | 0  |
| 0 | 100+ | 100+ | 1 | 0  |
| 0 | 100+ | 100+ | 1 | 0  |
| 0 | 83   | 2    | 1 | 2% |
