# Supplementary material for: A Plasmid Set for Efficient Bacterial Artificial Chromosome (BAC) Transgenesis in Zebrafish
Source: PubMed Central journal article supplement (PMC4825653; doi:10.1534/g3.115.026344), 2016-01-26
Supplement: supp_g3.115.026344_TableS4.pdf [file supp_g3.115.026344_TableS4.pdf]

**Table S4.** Results for the transgenesis rate of the *sdf1a:sdf1a-GFP; cryaa:dsRed* transgene.

| number of transgenic embryos | number of non-transgenic embryos | total number of embryos | number of screened injected fish | germline mosaicism in % |
|------------------------------|----------------------------------|-------------------------|----------------------------------|-------------------------|
| 0                            | 63                               | 63                      | 1                                | 0                       |
| 0                            | 65                               | 65                      | 2                                | 0                       |
| 0                            | 67                               | 67                      | 2                                | 0                       |
| 0                            | 69                               | 69                      | 1                                | 0                       |
| 0                            | 71                               | 71                      | 1                                | 0                       |
| 0                            | 80                               | 80                      | 1                                | 0                       |
| 0                            | 83                               | 83                      | 2                                | 0                       |
| 0                            | 89                               | 89                      | 2                                | 0                       |
| 0                            | 90                               | 90                      | 2                                | 0                       |
| 0                            | 100                              | 100                     | 1                                | 0                       |
| 0                            | 100                              | 100                     | 2                                | 0                       |
| 0                            | 100                              | 100                     | 2                                | 0                       |
| 0                            | 100                              | 100                     | 2                                | 0                       |
| 0                            | 103                              | 103                     | 1                                | 0                       |
| 0                            | 104                              | 104                     | 1                                | 0                       |
| 0                            | 105                              | 105                     | 1                                | 0                       |
| 0                            | 108                              | 108                     | 1                                | 0                       |
| 0                            | 110                              | 110                     | 1                                | 0                       |
| 0                            | 115                              | 115                     | 2                                | 0                       |
| 0                            | 120                              | 120                     | 2                                | 0                       |
| 0                            | 130                              | 130                     | 1                                | 0                       |
| 0                            | 150                              | 150                     | 2                                | 0                       |
| 0                            | 152                              | 152                     | 1                                | 0                       |
| 0                            | 170                              | 170                     | 2                                | 0                       |
| 0                            | 204                              | 204                     | 2                                | 0                       |
| 0                            | 204                              | 204                     | 2                                | 0                       |
| 0                            | 212                              | 212                     | 1                                | 0                       |
| 1                            | 120                              | 121                     | 1                                | 0.8                     |
| 2                            | 419                              | 421                     | 1                                | 0.5                     |
| 3                            | 100                              | 103                     | 1                                | 2.9                     |
| 3                            | 103                              | 106                     | 1                                | 2.8                     |
| 4                            | 204                              | 208                     | 1                                | 1.9                     |
| 5                            | 41                               | 46                      | 1                                | 10.9                    |
| 10                           | 52                               | 62                      | 1                                | 16.1                    |
| 10                           | 142                              | 152                     | 1                                | 6.6                     |
| 10                           | 146                              | 156                     | 1                                | 6.4                     |

|     |     |     |   |      |
|-----|-----|-----|---|------|
| 11  | 258 | 269 | 1 | 4.1  |
| 14  | 75  | 89  | 1 | 15.7 |
| 15  | 154 | 169 | 1 | 8.9  |
| 16  | 48  | 64  | 1 | 25.0 |
| 18  | 55  | 73  | 1 | 24.7 |
| 19  | 174 | 193 | 1 | 9.8  |
| 51  | 83  | 134 | 1 | 38.1 |
| 65  | 65  | 130 | 1 | 50.0 |
| 99  | 139 | 238 | 1 | 41.6 |
| 150 | 519 | 669 | 1 | 22.4 |
| 183 | 414 | 597 | 1 | 30.7 |
