# Supplementary material for: A Plasmid Set for Efficient Bacterial Artificial Chromosome (BAC) Transgenesis in Zebrafish
Source: PubMed Central journal article supplement (PMC4825653; doi:10.1534/g3.115.026344), 2016-01-26
Supplement: supp_g3.115.026344_TableS5.pdf [file supp_g3.115.026344_TableS5.pdf]

**Table S5.** Results for the transgenesis rate of the *sdf1a:sdf1a-3xFlag-4xHA; cryaa:dsRed* transgene of injected fish with no fluorescent protein expression in the lens.

| number of transgenic embryos | number of non-transgenic embryos | total number of embryos | number of screened injected fish | germline mosaicism in % |
|------------------------------|----------------------------------|-------------------------|----------------------------------|-------------------------|
| 0                            | 62                               | 62                      | 1                                | 0                       |
| 0                            | 62                               | 62                      | 1                                | 0                       |
| 0                            | 64                               | 64                      | 2                                | 0                       |
| 0                            | 64                               | 64                      | 2                                | 0                       |
| 0                            | 76                               | 76                      | 1                                | 0                       |
| 0                            | 76                               | 76                      | 1                                | 0                       |
| 0                            | 76                               | 76                      | 1                                | 0                       |
| 0                            | 78                               | 78                      | 2                                | 0                       |
| 0                            | 87                               | 87                      | 1                                | 0                       |
| 0                            | 110                              | 110                     | 2                                | 0                       |
| 0                            | 110                              | 110                     | 2                                | 0                       |
| 0                            | 110                              | 110                     | 2                                | 0                       |
| 0                            | 110                              | 110                     | 2                                | 0                       |
| 0                            | 130                              | 130                     | 1                                | 0                       |
| 0                            | 160                              | 160                     | 1                                | 0                       |
| 0                            | 164                              | 164                     | 1                                | 0                       |
| 0                            | 180                              | 180                     | 2                                | 0                       |
| 0                            | 180                              | 180                     | 2                                | 0                       |
| 0                            | 184                              | 184                     | 1                                | 0                       |
| 0                            | 184                              | 184                     | 1                                | 0                       |
| 0                            | 200                              | 200                     | 1                                | 0                       |
| 1                            | 98                               | 101                     | 1                                | 1.0                     |
| 2                            | 55                               | 57                      | 1                                | 3.5                     |
| 3                            | 62                               | 65                      | 1                                | 4.6                     |
