# Supplementary material for: A Plasmid Set for Efficient Bacterial Artificial Chromosome (BAC) Transgenesis in Zebrafish
Source: PubMed Central journal article supplement (PMC4825653; doi:10.1534/g3.115.026344), 2016-01-26
Supplement: supp_g3.115.026344_TableS6.pdf [file supp_g3.115.026344_TableS6.pdf]

**Table S6.** Results for the transgenesis rate of the *sdf1a:sdf1a-3xFlag-4xHA; cryaa:dsRed* transgene of injected fish with fluorescent protein expression in the lens.

| number of transgenic embryos | number of non-transgenic embryos | total number of embryos | number of screened injected fish | germline mosaicism in % |
|------------------------------|----------------------------------|-------------------------|----------------------------------|-------------------------|
| 0                            | 63                               | 63                      | 2                                | 0                       |
| 0                            | 63                               | 63                      | 2                                | 0                       |
| 0                            | 64                               | 64                      | 1                                | 0                       |
| 0                            | 80                               | 80                      | 1                                | 0                       |
| 0                            | 80                               | 80                      | 2                                | 0                       |
| 0                            | 80                               | 80                      | 2                                | 0                       |
| 0                            | 85                               | 85                      | 1                                | 0                       |
| 0                            | 100                              | 100                     | 1                                | 0                       |
| 0                            | 110                              | 110                     | 1                                | 0                       |
| 0                            | 145                              | 145                     | 2                                | 0                       |
| 0                            | 146                              | 146                     | 2                                | 0                       |
| 0                            | 146                              | 146                     | 2                                | 0                       |
| 0                            | 160                              | 160                     | 2                                | 0                       |
| 0                            | 160                              | 160                     | 2                                | 0                       |
| 0                            | 185                              | 185                     | 1                                | 0                       |
| 0                            | 200                              | 200                     | 2                                | 0                       |
| 0                            | 200                              | 200                     | 2                                | 0                       |
| 0                            | 250                              | 250                     | 1                                | 0                       |
| 1                            | 31                               | 32                      | 1                                | 3.1                     |
| 1                            | 140                              | 141                     | 1                                | 0.7                     |
| 2                            | 68                               | 70                      | 1                                | 2.9                     |
| 3                            | 360                              | 363                     | 1                                | 0.8                     |
| 4                            | 280                              | 284                     | 1                                | 1.4                     |
| 7                            | 18                               | 25                      | 1                                | 28.0                    |
| 8                            | 45                               | 53                      | 1                                | 15.1                    |
| 9                            | 88                               | 97                      | 1                                | 9.3                     |
| 16                           | 150                              | 166                     | 1                                | 9.6                     |
| 20                           | 155                              | 175                     | 1                                | 11.4                    |
| 22                           | 46                               | 68                      | 1                                | 32.4                    |
| 23                           | 99                               | 122                     | 1                                | 18.9                    |
| 40                           | 60                               | 100                     | 1                                | 40.0                    |
